# Supplementary material for: Wireless biomechanical power harvesting via flexible magnetostrictive ribbons
Source: Royal Society of Chemistry journal article supplement (doi:10.1039/c4ee01033g), 2014-01-01
Supplement: c4ee01033g2.pdf [file c4ee01033g2.pdf]

COMMUNICATION

**Wireless Biomechanical Power Harvesting  
via Flexible Magnetostrictive Ribbons**

Cite this: DOI: 10.1039/x0xx00000x

Received 00th January 2014,  
Accepted 00th January 2014

DOI: 10.1039/x0xx00000x

www.rsc.org/

Huai-An Chin,<sup>a</sup> Tian Liang,<sup>b</sup> Shiyu Xu,<sup>c</sup> Gerald R. Poirier,<sup>c</sup> Nan Yao,<sup>c</sup> Sigurd Wagner,<sup>a</sup> and Michael C. McAlpine<sup>d\*</sup>

**Supplementary Information**

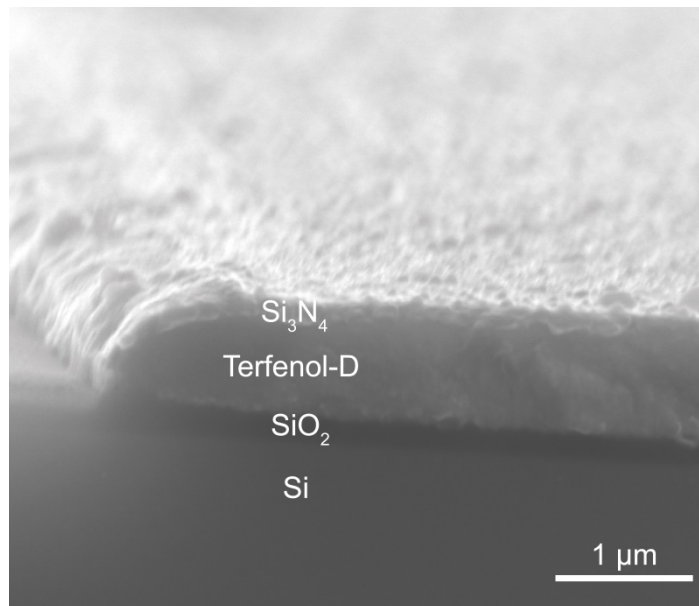

**Figure S1.** Cross sectional SEM of Si<sub>3</sub>N<sub>4</sub>/Terfenol-D/SiO<sub>2</sub>/Si (from top to bottom) after annealing. The ribbon thickness is ~650 nm.

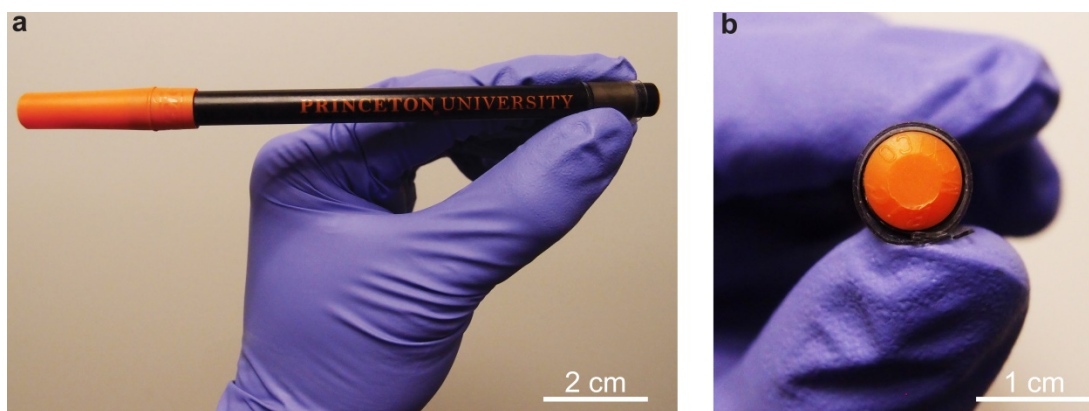

**Figure S2.** Flexible magnetostrictive ribbon / PDMS composite wrapped around a pen (diameter 8.1 mm). (a) Viewed from the side, and (b) viewed from the end.

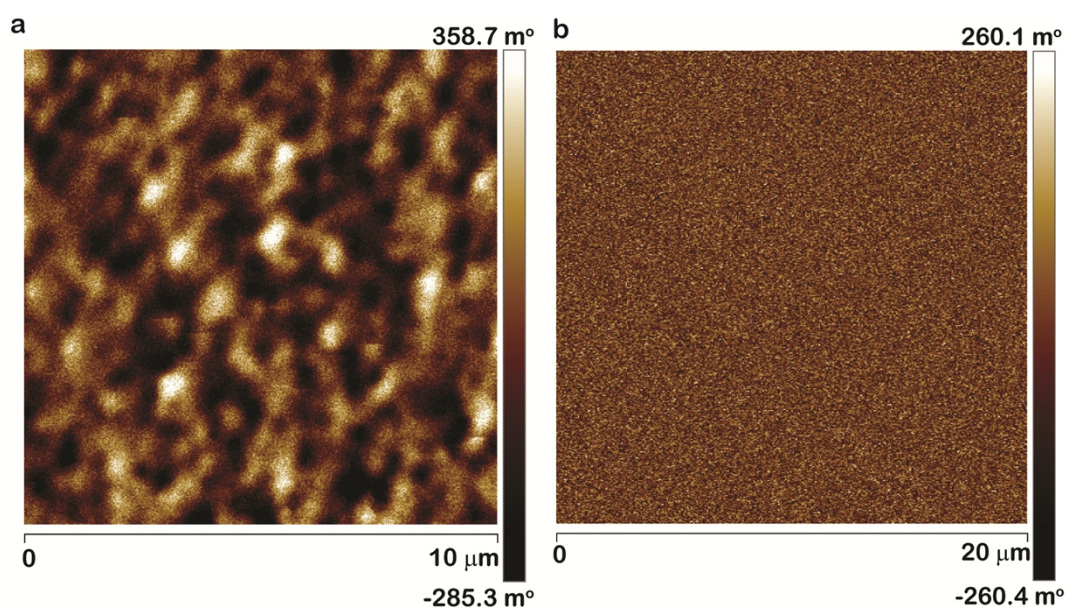

**Figure S3.** Magnetic Force Microscopy (MFM) scans of (a) a magnetostrictive Terfenol-D ribbon, and (b) a non-magnetic  $\text{SiO}_2$  sample.

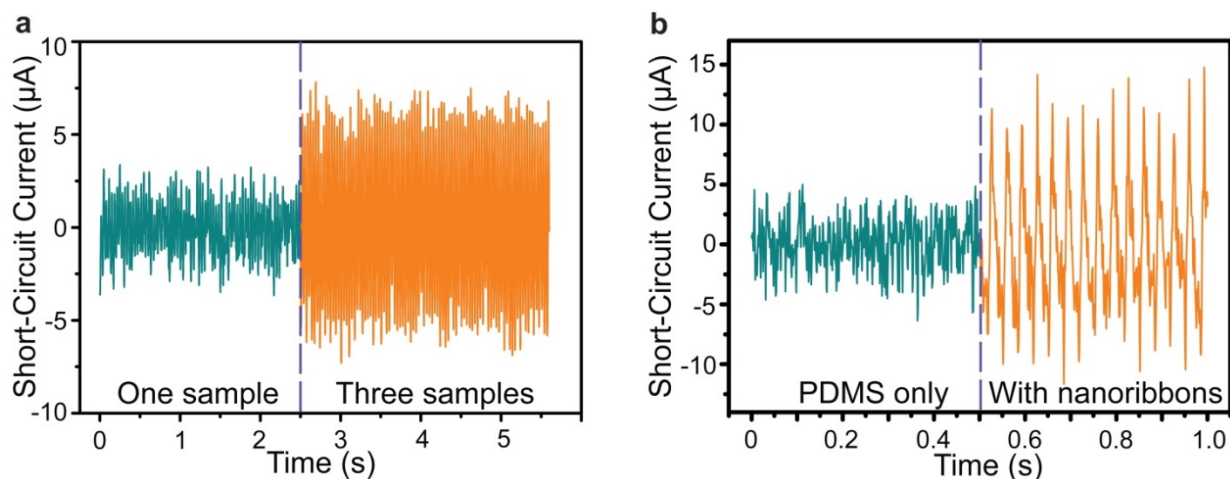

**Figure S4.** Comparisons of output short-circuit current from (a) one sample vs. three samples of harvesters, and (b) a PDMS only device vs. a composite containing ribbons. The Villari effect is an extensive effect and therefore the output signal should be proportional to the quantity of samples. From (a), it is clear that a larger quantity of samples results in higher output currents. From (b), it is clear that without the Terfenol-D ribbons, a pure PDMS sample only results in background noise without a distinguishable period, in contrast to the sample with Terfenol-D ribbons which has a period corresponding to the deformation period. Both (a) and (b) verify that the origin of the output signal originates from the Terfenol-D ribbons.

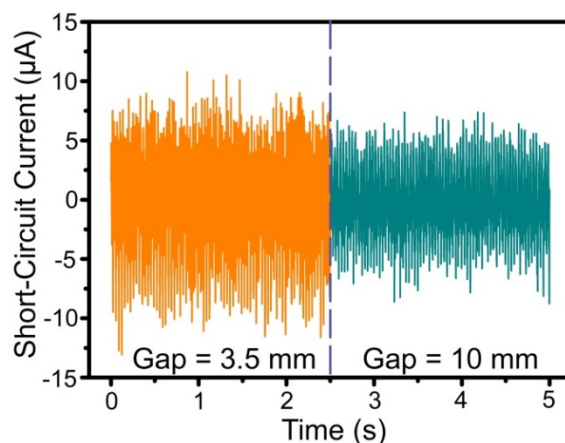

**Figure S5.** Output current at different distances between the sample and coils. The root-mean-square magnitudes of the current are  $3.9 \mu\text{A}$  for a distance of 3.5 mm, and  $1.32 \mu\text{A}$  for a gap of 10 mm, corresponding to average powers of 130 pW and 35 pW respectively.

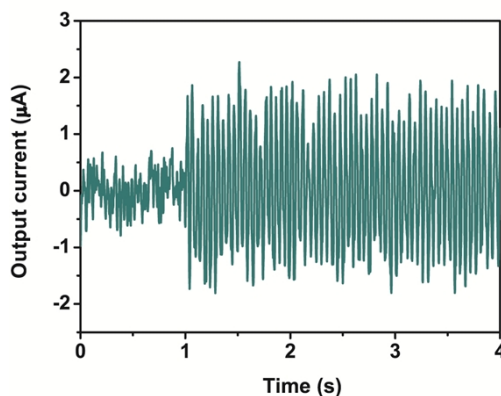

**Figure S6.** Output current of a flexible Terfenol-D ribbon sample under mechanical flapping deformations. The flapping did not start until 1 s, showing the higher output relative to the noise background signal. Figure 5c is the recording between 3-4 s in this figure.
